# Supplementary material for: Psilocybin-assisted therapy for reducing alcohol intake in patients with alcohol use disorder: protocol for a randomised, double-blinded, placebo-controlled 12-week clinical trial (The QUANTUM Trip Trial)
Source: PubMed Central journal article supplement — BMJ Open. 2022 Oct 14;12(10):e066019. doi: 10.1136/bmjopen-2022-066019 (PMC9577917; doi:10.1136/bmjopen-2022-066019), 2022-10-14
Supplement: bmjopen-2022-066019supp002.pdf [file bmjopen-2022-066019supp002.pdf]

The Quantum Trip Trial  
Informeret samtykke v2.0  
Protokol v2.0

Psykiatrisk Center København

10. juni 2021

Informeret samtykke til deltagelse i et sundhedsvidenskabeligt forskningsprojekt  
**Kan behandling med psilocybin reducere indtaget af alkohol hos patienter med diagnosen  
alkoholafhængighed?**

Original title: Can a single administration of psilocybin reduce alcohol intake in patients with alcohol use disorder? A randomized, double-blinded, placebo-controlled clinical trial.

**Erklæring fra forsøgspartagere:**

Jeg har fået skriftlig og mundlig information, og jeg ved nok om formål, metode og fordele og ulemper til at sige ja til at deltage. Jeg ved, at det er frivilligt at deltage, og jeg kan altid trække mit samtykke tilbage uden at miste mine nuværende eller fremtidige rettigheder til behandling.

Jeg giver samtykke til, at deltage i forskningsprojektet og til, at mit biologiske materiale udtages med henblik på opbevaring i en forskningsbiobank. Jeg har fået en kopi af dette samtykkeark samt en kopi af den skriftlige information om projektet til eget brug.

Forsøgspersonens navn: \_\_\_\_\_

Forsøgspersonens CPR: \_\_\_\_\_

Dato: \_\_\_\_\_ Underskrift: \_\_\_\_\_

Hvis der kommer nye væsentlige helbredsoplysninger frem om dig i forskningsprojektet vil du blive informeret. Vil du **frabede** dig information om nye væsentlige helbredsoplysninger, som kommer frem i forskningsprojektet, bedes du markere her: \_\_\_\_\_ (sæt x)

Vil du **frabede** dig at information om nye væsentlige helbredsoplysninger, som kommer frem i forskningsprojektet, videregives til egen læge, bedes du markere her: \_\_\_\_\_ (sæt x)

Må vi kontakte dig 6 og 12 måneder efter din behandling i projektet? Formålet er at undersøge eventuelle langvarige effekter. Ja: \_\_\_\_\_ (sæt x) Nej: \_\_\_\_\_ (sæt x)

Ønsker du at blive informeret om forskningsprojektet resultat?

Ja: \_\_\_\_\_ (sæt x) Nej: \_\_\_\_\_ (sæt x) Hvis ja, skriv din e-mail: \_\_\_\_\_

**Erklæring fra den informerende:**

Jeg erklærer, at forsøgspersonen har modtaget skriftlig og mundlig information om forsøget og har haft mulighed for at stille spørgsmål til mig. Efter min overbevisning er der givet tilstrækkelig information til, at der kan træffes beslutning om deltagelse i forsøget.

Den informerendes navn: \_\_\_\_\_

Dato: \_\_\_\_\_ Underskrift: \_\_\_\_\_
